# Supplementary material for: Transcriptomics and Proteomics Reveal the Cellulose and Pectin Metabolic Processes in the Tension Wood (Non-G-Layer) of Catalpa bungei
Source: MDPI journal article supplement (doi:10.3390/ijms21051686), 2020-03-01
Supplement: s1 [file s1]

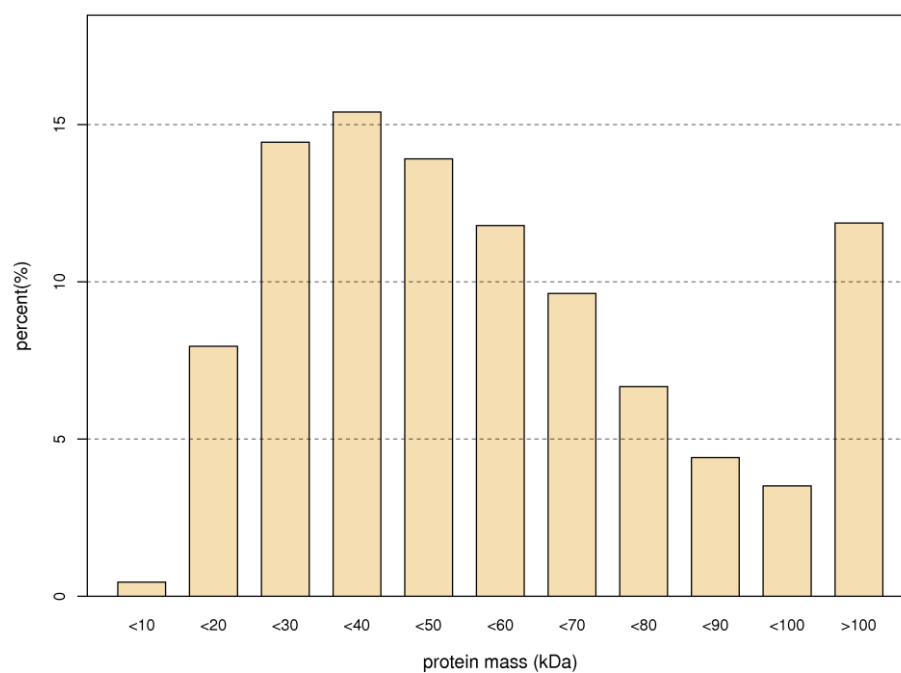

**Supplementary Figure 1.** The mass distribution of protein

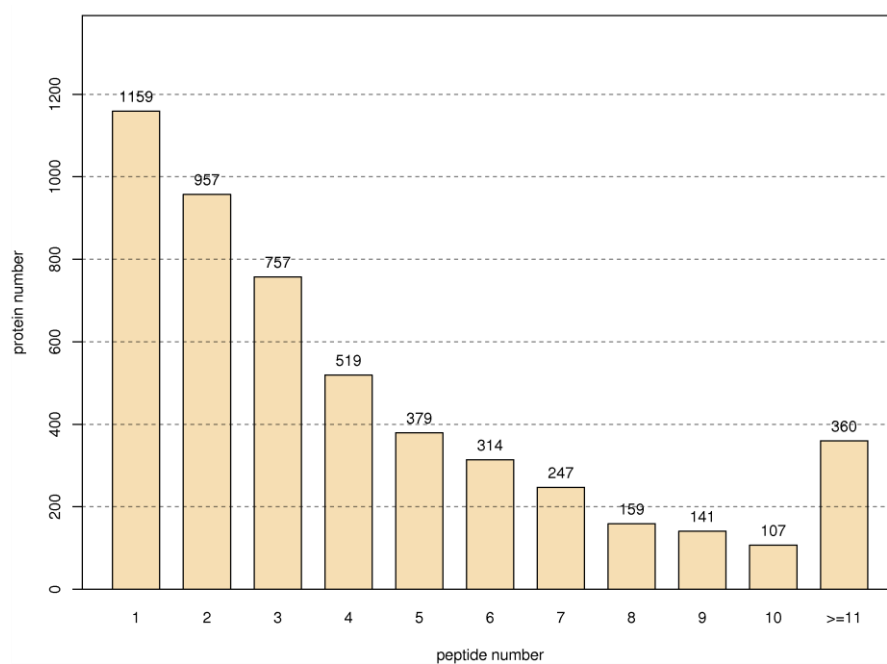

**Supplementary Figure S2.** The Peptide length profile.

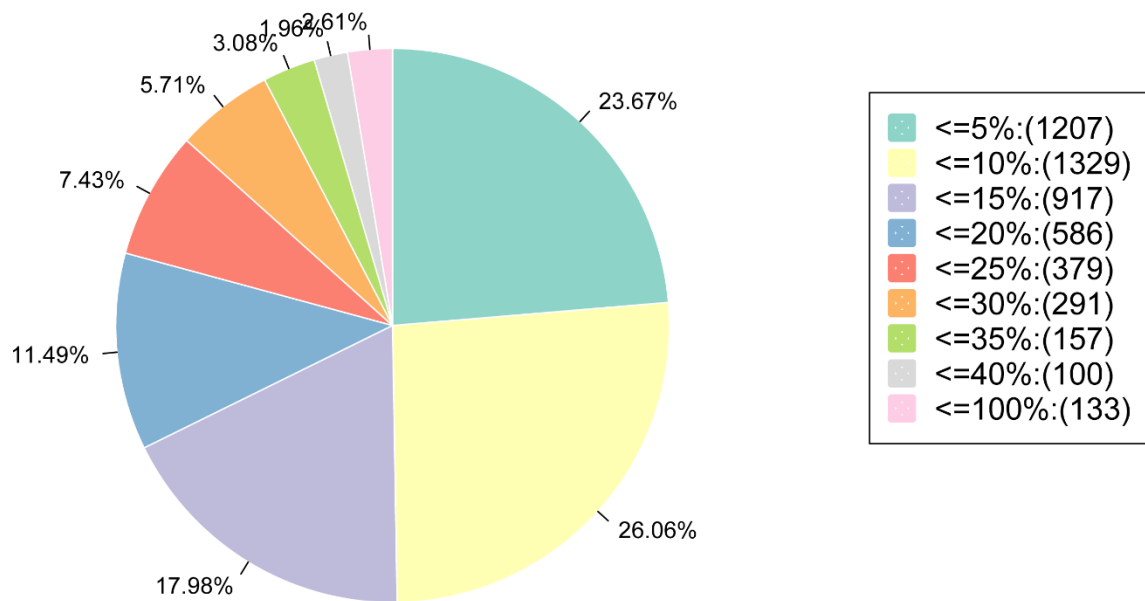

**Supplementary Figure S3.** Distribution of protein's sequence coverage.

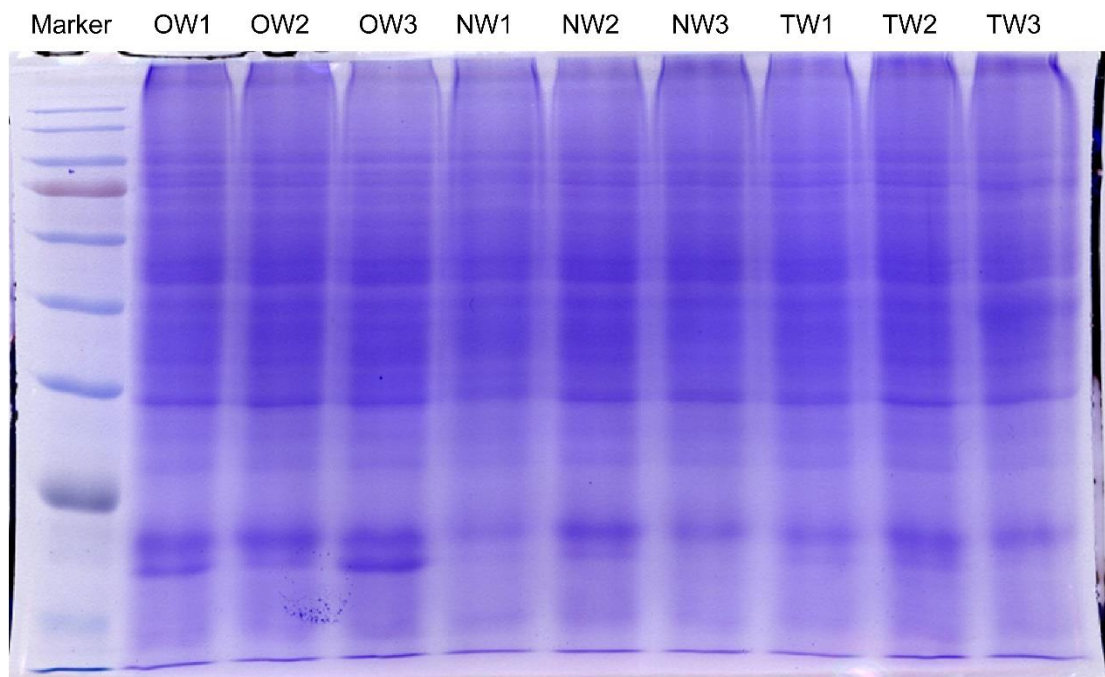

**Supplementary Figure S4.** The SDS-PAGE map of TW, OW and NW of *C. bungei*.
